# Supplementary material
Source: PubMed Central journal article supplement (PMC2951202)
Supplement: supp_M110.158485_CHUA_SUPPLEMENTARY_MATERIAL.pdf [file supp_M110.158485_CHUA_SUPPLEMENTARY_MATERIAL.pdf]

**CHUA et al. Supplementary Material**

**SUPPLEMENTARY FIGURE LEGENDS**

**Fig. S1.** HIF-1 $\alpha$  protein stabilization is not altered by modulating intracellular ROS

- (a) 143B cells were incubated at either 21% O<sub>2</sub> or 1% O<sub>2</sub> for 4 hours with glucose oxidase at concentration of 25, 100 and 200 mU/ml followed by analysis of HIF-1 $\alpha$  by Western blotting.
  
- (b) 143B control cells (open bar) and cytoplasmic catalase (CYTO-CAT) (filled bar) overexpressing cells were stained with 20  $\mu$ M 2'-7'-Dichlorodihydrofluorescein diacetate (DCFDA) dye for 15 min prior to H<sub>2</sub>O<sub>2</sub> (200  $\mu$ M) treatment for 5 min. The difference in fluorescence before and after the H<sub>2</sub>O<sub>2</sub> treatment was determined in control and CYTO-CAT cells. (n = 3, mean  $\pm$  SEM). 143B cells that overexpressed with cytoplasmic or mitochondrial catalase (CYTO- CAT or MITO-CAT) or control vector cells were subjected to 21% O<sub>2</sub> or 1% O<sub>2</sub> and HIF-1 $\alpha$  was detected by Western blotting.

**Fig. S2.** Superoxide is not involved in the regulation PHD activity *in vivo*

HEK293 cells treated with diethyldithiocarbamate (DCC) (1 mM), MnTBAP (100  $\mu$ M), N-acetylcysteine (NAC) (10 mM) and ascorbate (2.5 mM) were exposed to either 21% or 1% O<sub>2</sub>. HIF-1 $\alpha$  protein abundance was determined by Western blotting.

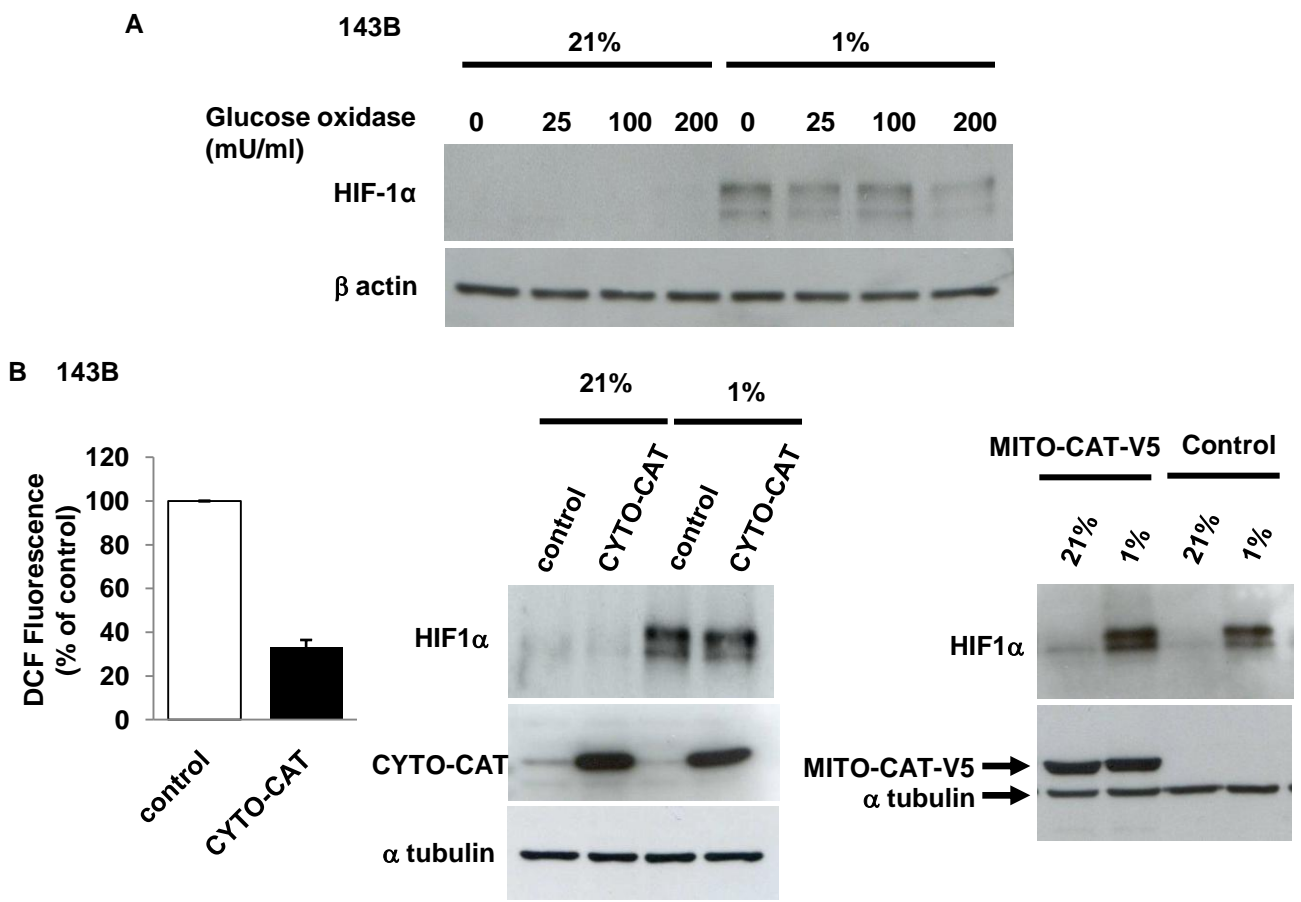

Fig. S1
